# Supplementary material for: Collection of VKM Paleofungi
Source: MDPI journal article supplement (doi:10.3390/d13090402), 2021-08-26
Supplement: s1 [file s1]

Table S1. Taxonomic diversity of collection of paleofungi

| Genus                  | Number of Species | Number of Strains |
|------------------------|-------------------|-------------------|
| 1                      | 2                 | 3                 |
| <i>Acremonium</i>      | 6                 | 10                |
| <i>Alternaria</i>      | 4                 | 21                |
| <i>Antrodia</i>        | 1                 | 3                 |
| <i>Arthrinium</i>      | 2                 | 2                 |
| <i>Articulospora</i>   | 1                 | 1                 |
| <i>Aspergillus</i>     | 9                 | 50                |
| <i>Aureobasidium</i>   | 2                 | 7                 |
| <i>Beauveria</i>       | 1                 | 1                 |
| <i>Bispora</i>         | 1                 | 2                 |
| <i>Bjerkandera</i>     | 1                 | 7                 |
| <i>Boeremia</i>        | 1                 | 1                 |
| <i>Botrytis</i>        | 1                 | 4                 |
| <i>Camarosporium</i>   | 1                 | 1                 |
| <i>Chaetomium</i>      | 2                 | 4                 |
| <i>Chaetophoma</i>     | 1                 | 1                 |
| <i>Chromelosporium</i> | 1                 | 1                 |
| <i>Chrysosporium</i>   | 1                 | 1                 |
| <i>Cladosporium</i>    | 5                 | 106               |
| <i>Colletotrichum</i>  | 1                 | 1                 |
| <i>Coniothyrium</i>    | 1                 | 1                 |
| <i>Dichobotrys</i>     | 1                 | 1                 |
| <i>Dichomitus</i>      | 1                 | 1                 |
| <i>Didymella</i>       | 1                 | 1                 |
| <i>Engyodontium</i>    | 1                 | 1                 |
| <i>Epicoccum</i>       | 1                 | 1                 |
| <i>Eurotium</i>        | 3                 | 8                 |
| <i>Exophiala</i>       | 2                 | 5                 |
| <i>Fusarium</i>        | 3                 | 4                 |
| <i>Ganoderma</i>       | 1                 | 1                 |
| <i>Geotrichum</i>      | 1                 | 7                 |
| <i>Hyphodontia</i>     | 1                 | 1                 |
| <i>Irpex</i>           | 1                 | 1                 |
| <i>Juxtiphoma</i>      | 1                 | 1                 |
| <i>Lecanicillium</i>   | 1                 | 1                 |
| <i>Lecythophora</i>    | 2                 | 4                 |
| <i>Leptodontidium</i>  | 1                 | 2                 |
| <i>Leptospora</i>      | 1                 | 1                 |
| <i>Malbranchea</i>     | 1                 | 2                 |
| <i>Monodictys</i>      | 1                 | 1                 |

| 1                           | 2  | 3   |
|-----------------------------|----|-----|
| <i>Mucor</i>                | 4  | 8   |
| <i>Neocucurbitaria</i>      | 1  | 1   |
| <i>Oidiodendron</i>         | 1  | 1   |
| <i>Oxyporus</i>             | 1  | 1   |
| <i>Paecilomyces</i>         | 1  | 5   |
| <i>Papulaspora</i>          | 1  | 3   |
| <i>Paraphoma</i>            | 1  | 1   |
| <i>Parastagonospora</i>     | 1  | 1   |
| <i>Penicillium</i>          | 43 | 241 |
| <i>Penidiella</i>           | 1  | 1   |
| <i>Phaeosphaeria</i>        | 1  | 1   |
| <i>Phialocephala</i>        | 1  | 1   |
| <i>Phialophora</i>          | 4  | 15  |
| <i>Phoma</i>                | 2  | 8   |
| <i>Phomatodes</i>           | 1  | 2   |
| <i>Pilidium</i>             | 1  | 3   |
| <i>Pseudeurotium</i>        | 1  | 10  |
| <i>Pseudogymnoascus</i>     | 2  | 87  |
| <i>Purpureocillium</i>      | 1  | 1   |
| <i>Remotididymella</i>      | 1  | 1   |
| <i>Rhexocercosporidium</i>  | 1  | 1   |
| <i>Schizophyllum</i>        | 1  | 2   |
| <i>Scopulariopsis</i>       | 1  | 3   |
| <i>Septoriella</i>          | 1  | 1   |
| <i>Similiphoma</i>          | 1  | 1   |
| <i>Sistotrema</i>           | 1  | 1   |
| <i>Sphaeronaemella</i>      | 1  | 4   |
| <i>Sporotrichum</i>         | 1  | 2   |
| <i>Stachybotrys</i>         | 1  | 1   |
| <i>Stereum</i>              | 1  | 2   |
| <i>Thanatephorus</i>        | 1  | 1   |
| <i>Thysanophora</i>         | 1  | 1   |
| <i>Tolypocladium</i>        | 1  | 1   |
| <i>Trichoderma</i>          | 3  | 4   |
| <i>Valsa</i>                | 1  | 1   |
| <i>Venturia</i>             | 1  | 1   |
| <i>Verticillium</i>         | 2  | 3   |
| <i>Wardomyces</i>           | 1  | 1   |
| <i>Xylohypha</i>            | 1  | 1   |
| <i>Zymoseptoria</i>         | 1  | 1   |
| Unidentified fungal strains |    | 86  |
